# Supplementary material
Source: ML conference proceedings conference paper supplement (https://proceedings.neurips.cc/paper_files/paper/2015/hash/c44e503833b64e9f27197a484f4257c0-Abstract.html)
Supplement: Supplementary file [file c44e503833b64e9f27197a484f4257c0-Supplemental.zip]

---

# Supplementary materials for: Robust PCA with compressed data

---

**Wooseok Ha**  
University of Chicago  
haywse@uchicago.edu

**Rina Foygel Barber**  
University of Chicago  
rina@uchicago.edu

## A Results for multivariate linear regression

In multivariate regression / multitask learning, we are given a collection of  $n$  regression problems in  $\mathbb{R}^m$ , where the data at hand is of the form  $Y_j \in \mathbb{R}^m$  for each task  $j = 1, \dots, n$ , and  $X \in \mathbb{R}^{m \times d}$  is the design matrix. If we denote the unknown regression matrix as  $B \in \mathbb{R}^{d \times n}$ , our observed data can be written as

$$Y = X \cdot B + W$$

where  $W \in \mathbb{R}^{m \times n}$  is the observation noise matrix. Suppose the matrix of coefficients  $B$  has an exact low-rank plus sparse decomposition, in which case we can write  $B^\top = L^* + S^*$  where  $\text{rank}(L^*) \leq r$  and  $\max_i \|S_{i*}^*\|_0 \leq s$ . Then, by taking the transpose of the observation model

$$Y^\top = (L^* + S^*) \cdot X^\top + W^\top, \quad (1)$$

we see that this is a special instance of our initial model (1), where compression matrix is given by  $C = X^\top$  and error term is  $Z = W^\top$ . We emphasize here that in most multivariate regression / multitask learning problems, compression matrix  $X^\top$  cannot be controlled by the user and is obtained through observing the specific event or phenomenon. For this section, we assume a fixed design matrix  $X$  satisfying a restricted eigenvalue property (a standard assumption for many sparse regression problems [2]). In this setting, we aim to recover the low-rank product  $P^* = L^* \cdot X^\top$  and the sparse matrix  $S^*$  by solving the convex program (2). We state the performance of the recovered solution, which can be obtained from Theorem 1.

**Proposition 1.** *Assume the model (1), where  $B^\top = L^* + S^*$ , with  $\text{rank}(L^*) \leq r$ , and  $\max_i \|S_{i*}^*\|_0 \leq s$ . Assume that  $X$  has unit-length columns and satisfies  $\text{RE}_{m,d}(c_1, c_2)$ , where*

$$c_0 := c_1 - c_2 \cdot \sqrt{\frac{16s \log(d)}{m}} > 0,$$

*and assume that  $W_{ij} \stackrel{\text{iid}}{\sim} N(0, \sigma^2)$ . Then there exist universal constants  $c, c', c'' > 0$  such that if we choose<sup>1</sup>*

$$\alpha \geq \|L^* X^\top X\|_\infty, \quad \nu \geq 6\sigma\sqrt{n+m}, \quad \lambda \geq 4\sigma\sqrt{\log(nd)} + 4\alpha,$$

*and if  $m \geq c \cdot s \log(nd)$ , then the solution  $(\hat{P}, \hat{S})$  to the convex program (2) (with  $Y^\top$  in place of  $Y$ ) satisfies*

$$\|\hat{P} - P^*\|_F^2 + \|\hat{S} - S^*\|_F^2 \leq c' \cdot c_0^{-4} \cdot (r\sigma^2(n+m) + (\sigma^2 \log(nd) + \alpha^2)sn)$$

*with probability at least  $1 - \frac{c''}{nd}$ .*

---

<sup>1</sup>Requiring that we choose  $\alpha$  to satisfy  $\alpha \geq \|L^* X^\top X\|_\infty$  is of course nontrivial since  $L^*$  is not known. However, under several natural models for  $L^*$  and for  $X$ , this quantity can easily be bounded. For example, if we treat  $X$  as fixed and assume that the singular vectors of the rank- $r$  matrix  $L^*$  are chosen uniformly at random, one can show that  $\|L^* X^\top X\|_\infty \sim \sqrt{d \log(nd)/m}$ .

*Remark 1.* If the entries of  $W$  are subgaussian rather than Gaussian, then the same result holds, except for a change in the constants appearing in the parameters  $(\alpha, \nu, \lambda)$ .

*Remark 2.* Corollary 4 in Agarwal et al [1] provides the result that leads to the same scaling as our result. However, they essentially require  $m \geq d$  as opposed to our case that only requires  $m \geq c \cdot s \log(nd)$ . We also provide recovery guarantee of the compressed low-rank component  $P^* = L^* \cdot X^\top$  rather than the low-rank component of coefficients  $L^*$  as in [1].

## B Details for chlorine data experiment

This section gives details for the chlorine data experiment described in Section 4.2. We first introduce missing entries in the data matrix  $D$  and focus on predicting those entries by solving the convex program (2) based on the reweighted partially observed data matrix  $D_\Omega$ . To do this, we follow a missing at random model, partitioning the  $nd$  entries into three sets,  $\Omega_{\text{obs}} \cup \Omega_{\text{val}} \cup \Omega_{\text{test}}$ , where  $\Omega_{\text{obs}}$  contains the observed data (80% of all entries),  $\Omega_{\text{val}}$  is a validation set for tuning (10% of all entries), and  $\Omega_{\text{test}}$  is the test set (10% of all entries). For each  $j \in [d]$ , we define the set of observed entries in column  $j$  as  $O_j := \{i \in [n] : (i, j) \in \Omega_{\text{obs}}\}$  and similarly for  $V_j$  and  $T_j$ . We will then proceed as follows: Fixing  $\nu$  and  $\lambda$ , solve the convex program (2) using the compressed reweighted data matrix  $\tilde{D}_{\Omega_{\text{obs}}} \cdot C$  to obtain an estimator  $(\hat{P}, \hat{S})$ . According to the low-rank + sparse decomposition, the column span of  $\hat{P}$  should closely approximate  $D - \rho \cdot \hat{S}$ , and so we should have  $(D - \rho \cdot \hat{S})_{*j} \approx \hat{P} \cdot w_j$  for some  $w_j$ . We compute  $w_j$  using least squares on the observed data, i.e.

$$w_j = (\hat{P}_{O_j*}^\top \hat{P}_{O_j*})^{-1} \hat{P}_{O_j*} (D - \rho \cdot \hat{S})_{O_j,j}.$$

We then predict the missing entries located at the validation set entries  $V_j$  as

$$\hat{D}_{V_j,j} = \hat{P}_{V_j*} \cdot w_j + \hat{S}_{V_j,j}.$$

Since we have no information for recovering  $S_{ij}^*$  for  $(i, j) \notin \Omega_{\text{obs}}$ , we remove the largest 1% of entries of prediction error  $\hat{D}_{\Omega_{\text{val}}} - D_{\Omega_{\text{val}}}$  and evaluate the prediction performance only using the remaining 99% of the entries:

$$\|(\hat{D}_{\Omega_{\text{val}}} - D_{\Omega_{\text{val}}})_{\text{bottom } 99\%}\|_F^2.$$

With this prediction performance criteria, we choose the optimal regularization parameters  $\nu_{\text{opt}}, \lambda_{\text{opt}}$  and finally outputs the prediction error evaluated on the test set:

$$\|(\hat{D}_{\Omega_{\text{test}}} - D_{\Omega_{\text{test}}})_{\text{bottom } 99\%}\|_F^2.$$

## C Proofs of theorems

### C.1 Proof of Theorem 1

**Background** First we introduce a few definitions which are now standard for the analysis of this type of structured problem, using the decomposability of the  $\ell_1$  norm and the nuclear norm. Let  $\Omega \subset [n] \times [d]$  be the support of the true sparse component  $S^*$ , and let  $\Omega_i \subset [d]$  be the  $i$ -th row of  $\Omega$ , i.e.  $\Omega_i = \{j : S_{ij}^* \neq 0\}$ . Let  $T$  be the tangent space to the nuclear norm at  $P^*$ , which is given by [3]

$$T = \{AV^\top + UB^\top : \text{any matrices } A \in \mathbb{R}^{n \times r}, B \in \mathbb{R}^{m \times r}\},$$

where  $P^* = U\Sigma V^\top$  is a singular value decomposition of  $P^*$  with  $U \in \mathbb{R}^{n \times r}$  and  $V \in \mathbb{R}^{m \times r}$ . It is known [2] that, for any  $S \in \mathbb{R}^{n \times d}$ , for each row  $i \in [n]$ ,

$$\|S_{i*}^*\|_1 - \|S_{i*}\|_1 \leq \|(S - S^*)_{i\Omega_i}\|_1 - \|(S - S^*)_{i\Omega_i^c}\|_1, \quad (2)$$

which trivially yields

$$\|S^*\|_1 - \|S\|_1 \leq \|\mathcal{P}_\Omega(S - S^*)\|_1 - \|\mathcal{P}_\Omega^\perp(S - S^*)\|_1, \quad (3)$$

where  $\mathcal{P}_\Omega(\cdot)$  and  $\mathcal{P}_\Omega^\perp(\cdot)$  denote projection onto the subspace of matrices supported on  $\Omega$ , and onto the orthogonal subspace. Furthermore for any  $P \in \mathbb{R}^{n \times m}$ ,

$$\|P^*\|_* - \|P\|_* \leq \|\mathcal{P}_T(P - P^*)\|_* - \|\mathcal{P}_T^\perp(P - P^*)\|_*, \quad (4)$$

where  $\mathcal{P}_T(\cdot)$  and  $\mathcal{P}_T^\perp(\cdot)$  denote projection onto the subspace  $T \subset \mathbb{R}^{n \times m}$ , and onto its orthogonal complement  $T^\perp$ . Throughout, we will use the facts that  $\|M\|_* \leq \|\mathcal{P}_T(M)\|_* + \|\mathcal{P}_T^\perp(M)\|_*$  and similarly  $\|M\|_1 \leq \|\mathcal{P}_\Omega(M)\|_1 + \|\mathcal{P}_\Omega^\perp(M)\|_1$  without comment.

| Notation               | Definition                                                                                  | Name                                                                          |
|------------------------|---------------------------------------------------------------------------------------------|-------------------------------------------------------------------------------|
| $[n]$                  | $\{1, \dots, n\}$                                                                           |                                                                               |
| $\ v\ _0$ or $\ M\ _0$ | $\sum_i \mathbb{1}_{v_i \neq 0}$ or $\sum_{ij} \mathbb{1}_{M_{ij} \neq 0}$                  | number of nonzeros in vector $v$ or matrix $M$                                |
| $M_{*j}$               | $(M_{1j}, M_{2j}, \dots)$                                                                   | $j$ th column of the matrix $M$                                               |
| $M_{i*}$               | $(M_{i1}, M_{i2}, \dots)$                                                                   | $i$ th row of the matrix $M$<br>(always treated as a column vector)           |
| $M_{AB}$               | $(M_{ij})_{i \in A, j \in B}$                                                               | the submatrix of $M$ indexed by $A \times B$                                  |
| $\ M\ _F$              | $\sqrt{\sum_{ij} M_{ij}^2}$                                                                 | Frobenius norm                                                                |
| $\ M\ _1$              | $\sum_{ij}  M_{ij} $                                                                        | elementwise $\ell_1$ norm                                                     |
| $\ M\ _\infty$         | $\max_{ij}  M_{ij} $                                                                        | elementwise $\ell_\infty$ norm                                                |
| $\ M\ _{2,\infty}$     | $\max_i \ M_{i*}\ _2$                                                                       | largest row $\ell_2$ norm                                                     |
| $\ M\ $                | $\max_v \frac{\ Mv\ _2}{\ v\ _2}$                                                           | spectral norm (a.k.a. operator norm)                                          |
| $\ M\ _*$              | $\sum_i \sigma_i(M)$ where $\sigma_1(M), \sigma_2(M), \dots$ are the singular values of $M$ | nuclear norm (a.k.a. trace norm)                                              |
| $c, c', c'', \dots$    |                                                                                             | universal constants (whose definitions may change from one result to another) |

Table 1: Notation used throughout the proofs.

**Basic inequality** By optimality,

$$\frac{1}{2} \|Y - \hat{P} - \hat{S}C\|_F^2 + \nu \|\hat{P}\|_* + \lambda \|\hat{S}\|_1 \leq \frac{1}{2} \|Y - P^* - S^*G\|_F^2 + \nu \|P^*\|_* + \lambda \|S^*\|_1. \quad (5)$$

Define errors  $\Delta^P = \hat{P} - P^*$  and  $\Delta^S = \hat{S} - S^*$ . Using our model (1) for  $Y$ , and applying (3) and (4), we rearrange terms to obtain

$$\begin{aligned} \frac{1}{2} \|\Delta^P + \Delta^S C\|_F^2 &\leq \langle Z, \Delta^P + \Delta^S C \rangle + \nu (\|\mathcal{P}_T(\Delta^P)\|_* - \|\mathcal{P}_T^\perp(\Delta^P)\|_*) \\ &\quad + \lambda (\|\mathcal{P}_\Omega(\Delta^S)\|_1 - \|\mathcal{P}_\Omega^\perp(\Delta^S)\|_1) \\ &\leq \|Z\| \cdot \|\Delta^P\|_* + \|ZC^\top\|_\infty \cdot \|\Delta^S\|_1 + \nu (\|\mathcal{P}_T(\Delta^P)\|_* - \|\mathcal{P}_T^\perp(\Delta^P)\|_*) \\ &\quad + \lambda (\|\mathcal{P}_\Omega(\Delta^S)\|_1 - \|\mathcal{P}_\Omega^\perp(\Delta^S)\|_1) \\ &\leq \|\mathcal{P}_T(\Delta^P)\|_*(\nu + \|Z\|) - \|\mathcal{P}_T^\perp(\Delta^P)\|_*(\nu - \|Z\|) \\ &\quad + \|\mathcal{P}_\Omega(\Delta^S)\|_1(\lambda + \|ZC^\top\|_\infty) - \|\mathcal{P}_\Omega^\perp(\Delta^S)\|_1(\lambda - \|ZC^\top\|_\infty). \end{aligned}$$

Now we consider the left-hand side. We have

$$\begin{aligned} \frac{1}{2} \|\Delta^P + \Delta^S C\|_F^2 &= \frac{1}{2} \|\Delta^P\|_F^2 + \frac{1}{2} \|\Delta^S C\|_F^2 + \langle \Delta^P, \Delta^S C \rangle \\ &\geq \frac{1}{2} \|\Delta^P\|_F^2 + \frac{1}{2} \|\Delta^S C\|_F^2 - \|\Delta^P C^\top\|_\infty \cdot \|\Delta^S\|_1 \\ &\geq \frac{1}{2} \|\Delta^P\|_F^2 + \frac{1}{2} \|\Delta^S C\|_F^2 - 2\alpha \|\Delta^S\|_1, \end{aligned}$$

where the last step uses  $\|\Delta^P C^\top\|_\infty \leq \|\hat{P} C^\top\|_\infty + \|P^* C^\top\|_\infty \leq 2\alpha$  by the assumption  $\|P^* C^\top\|_\infty \leq \alpha$  (6) and the constraint  $\|\hat{P} C^\top\|_\infty \leq \alpha$  in the optimization problem (2). Including this into the work above, then,

$$\begin{aligned} \frac{1}{2} \|\Delta^P\|_F^2 + \frac{1}{2} \|\Delta^S C\|_F^2 &\leq \|\mathcal{P}_T(\Delta^P)\|_*(\nu + \|Z\|) - \|\mathcal{P}_T^\perp(\Delta^P)\|_*(\nu - \|Z\|) \\ &\quad + \|\mathcal{P}_\Omega(\Delta^S)\|_1(\lambda + \|ZC^\top\|_\infty + 2\alpha) - \|\mathcal{P}_\Omega^\perp(\Delta^S)\|_1(\lambda - \|ZC^\top\|_\infty - 2\alpha) \\ &\leq \nu(1.5\|\mathcal{P}_T(\Delta^P)\|_* - 0.5\|\mathcal{P}_T^\perp(\Delta^P)\|_*) + \lambda(1.5\|\mathcal{P}_\Omega(\Delta^S)\|_1 - 0.5\|\mathcal{P}_\Omega^\perp(\Delta^S)\|_1), \quad (6) \end{aligned}$$

where the last step uses the assumptions (6) on the parameters  $(\alpha, \nu, \lambda)$ .

**Strong convexity** Next, we need to use the restricted strong convexity assumption on  $C$ . First, we consider the rows of  $\hat{S}$  individually. Fixing  $\hat{P}$ , we note that the optimization problem (2) separates over the rows of  $\hat{S}$ : ignoring the term  $\nu\|\hat{P}\|_*$  which is constant with respect to  $S$ , we have

$$\frac{1}{2}\|Y - \hat{P} - \hat{S}C\|_F^2 + \lambda\|\hat{S}\|_1 = \sum_i \left( \frac{1}{2}\|Y_{i*} - \hat{P}_{i*} - C^\top \hat{S}_{i*}\|_2^2 + \lambda\|\hat{S}_{i*}\|_1 \right).$$

Therefore,  $\hat{S}_{i*}$  is the minimizer of the term in parentheses, for each  $i$ , and in particular we have

$$\frac{1}{2}\|Y_{i*} - \hat{P}_{i*} - C^\top \hat{S}_{i*}\|_2^2 + \lambda\|\hat{S}_{i*}\|_1 \leq \frac{1}{2}\|Y_{i*} - \hat{P}_{i*} - C^\top S_{i*}^*\|_2^2 + \lambda\|S_{i*}^*\|_1.$$

Rearranging terms and applying (2), we get

$$\begin{aligned} \frac{1}{2}\|C^\top(\hat{S}_{i*} - S_{i*}^*)\|_2^2 &\leq \langle Y_{i*} - \hat{P}_{i*} - C^\top S_{i*}^*, \Delta_{i*}^S \rangle + \lambda \left( \|\Delta_{i\Omega_i}^S\|_1 - \|\Delta_{i\Omega_i^c}^S\|_1 \right) \\ &\leq \|C(Y_{i*} - \hat{P}_{i*} - C^\top S_{i*}^*)\|_\infty \cdot \|\Delta_{i*}^S\|_1 + \lambda \left( \|\Delta_{i\Omega_i}^S\|_1 - \|\Delta_{i\Omega_i^c}^S\|_1 \right). \end{aligned}$$

We also have

$$\begin{aligned} \|C(Y_{i*} - \hat{P}_{i*} - C^\top S_{i*}^*)\|_\infty &= \|C(Z_{i*} - (\hat{P} - P^*)_{i*})\|_\infty \leq \|(Z - (\hat{P} - P^*))C^\top\|_\infty \\ &\leq \|ZC^\top\|_\infty + \|\hat{P}C^\top\|_\infty + \|P^*C^\top\|_\infty \leq \|ZC^\top\|_\infty + 2\alpha \leq \lambda/2, \end{aligned}$$

by the assumption (6) on  $\lambda$ . Combining this with the above, we then have

$$\frac{1}{2}\|C^\top \Delta_{i*}^S\|_2^2 \leq \lambda \left( 1.5\|\Delta_{i\Omega_i}^S\|_1 - 0.5\|\Delta_{i\Omega_i^c}^S\|_1 \right),$$

and since the left-hand side is nonnegative, we therefore have

$$\|\Delta_{i\Omega_i^c}^S\|_1 \leq 3\|\Delta_{i\Omega_i}^S\|_1,$$

that is, for *every* row of the sparse matrix, a substantial portion of the  $\ell_1$  norm of the error is located on the correct support. Therefore,

$$\|\Delta_{i*}^S\|_1 = \|\Delta_{i\Omega_i^c}^S\|_1 + \|\Delta_{i\Omega_i}^S\|_1 \leq 4\|\Delta_{i\Omega_i}^S\|_1 \leq 4\sqrt{s}\|\Delta_{i\Omega_i}^S\|_2 \leq 4\sqrt{s}\|\Delta_{i*}^S\|_2,$$

where the next-to-last inequality holds because  $|\Omega_i| \leq s$  by assumption on the sparsity of the row  $S_{i*}^*$ .

Next, by assumption of the theorem,  $C^\top$  satisfies  $\text{RE}_{m,d}(c_1, c_2)$ . We then have

$$\|C^\top \Delta_{i*}^S\|_2 \geq c_1\|\Delta_{i*}^S\|_2 - c_2 \cdot \sqrt{\frac{\log(d)}{m}}\|\Delta_{i*}^S\|_1 \geq \left( c_1 - c_2 \cdot 4\sqrt{s} \cdot \sqrt{\frac{\log(d)}{m}} \right) \|\Delta_{i*}^S\|_2 = c_0\|\Delta_{i*}^S\|_2,$$

where the last step uses the definition of  $c_0$  in the theorem. (Recall that  $c_0 > 0$  by assumption.) Summing over the rows, we then have

$$\|\Delta^S C\|_F^2 = \sum_i \|C^\top \Delta_{i*}^S\|_2^2 \geq \sum_i c_0^2 \|\Delta_{i*}^S\|_2^2 = c_0^2 \|\Delta^S\|_F^2. \quad (7)$$

**Combining everything** Now we return to (6) and plug in our result in (7), to obtain

$$\frac{1}{2}\|\Delta^P\|_F^2 + \frac{c_0^2}{2}\|\Delta^S\|_F^2 \leq \nu(1.5\|\mathcal{P}_T(\Delta^P)\|_* - 0.5\|\mathcal{P}_T^\perp(\Delta^P)\|_*) + \lambda(1.5\|\mathcal{P}_\Omega(\Delta^S)\|_1 - 0.5\|\mathcal{P}_\Omega^\perp(\Delta^S)\|_1).$$

Removing negative terms from the right-hand side and multiplying by 2,

$$\|\Delta^P\|_F^2 + c_0^2\|\Delta^S\|_F^2 \leq 3\nu\|\mathcal{P}_T(\Delta^P)\|_* + 3\lambda\|\mathcal{P}_\Omega(\Delta^S)\|_1.$$

Since  $\text{rank}(\mathcal{P}_T(\Delta^P)) \leq 2r$  by definition of  $T$ , and similarly since  $\|\mathcal{P}_\Omega(\Delta^S)\|_0 \leq sn$  by definition of  $\Omega$ , we have

$$\begin{aligned} \|\Delta^P\|_F^2 + c_0^2\|\Delta^S\|_F^2 &\leq 3\nu\|\mathcal{P}_T(\Delta^P)\|_F \cdot \sqrt{2r} + 3\lambda\|\mathcal{P}_\Omega(\Delta^S)\|_F \cdot \sqrt{sn} \\ &\leq 3\nu\|\Delta^P\|_F \cdot \sqrt{2r} + 3\lambda\|\Delta^S\|_F \cdot \sqrt{sn} \\ &\leq \sqrt{\|\Delta^P\|_F^2 + c_0^2\|\Delta^S\|_F^2} \cdot \sqrt{18r\nu^2 + 9c_0^{-2}sn\lambda^2}, \end{aligned}$$

where the last step uses the Cauchy-Schwarz inequality. In particular, this implies that

$$\|\Delta^P\|_F^2 + c_0^2\|\Delta^S\|_F^2 \leq 18r\nu^2 + 9c_0^{-2}sn\lambda^2,$$

which proves the desired result.

## C.2 Proof of Theorem 2

This result is a straightforward application of Theorem 1. It will be sufficient to check that, with the stated probability, the following statements all hold:

$$C^\top \text{ satisfies } \text{RE}_{m,d}(c_1, c_2), \text{ with } c_0 := c_1 - c_2 \sqrt{\frac{16s \log(d)}{m}} > 0, \quad (8)$$

and

$$\alpha \geq \|L^* C C^\top\|_\infty, \nu \geq 2\|Z\|, \lambda \geq 2\|Z C^\top\|_\infty + 4\alpha. \quad (9)$$

To prove that (8) holds, the following lemma is sufficient (along with the assumption  $m \geq c \cdot s \log(nd)$ ):

**Lemma 1.** *Under either the Gaussian model (3) or the orthogonal model (4) for the compression matrix  $C$ , for any  $\delta > 0$ ,  $C^\top$  satisfies  $\text{RE}_{m,d}(c_1, c_2)$  for constants*

$$c_1 = \frac{1}{4(2 + \sqrt{2})} \quad \text{and} \quad c_2 = \frac{9}{2 + \sqrt{2}}$$

with probability at least  $1 - c' e^{-cm}$ , where  $c, c' > 0$  are universal constants.

To prove (9), we consider the first inequality by treating  $L^*$  as fixed and analysing the random model for  $C$ :

**Lemma 2.** *Under either the Gaussian model (3) or the orthogonal model (4) for  $C$ , for any fixed matrix  $L^* \in \mathbb{R}^{n \times d}$  and fixed  $\delta > 0$ , if  $m \geq 16 \log(nd)$ , then*

$$\mathbb{P} \left\{ \|L^* C C^\top\|_\infty > \|L^*\|_\infty \cdot \left( 1 + \sqrt{\frac{16d \log(nd)}{m}} \right) \right\} \leq \frac{4}{nd}.$$

For the second and third inequalities in (9), we first have the following bound on  $C$ :

**Lemma 3.** *Under either the Gaussian (3) or orthogonal (4) model for  $C$ , with probability at least  $1 - 2de^{-m/8}$ ,*

$$\|C\| \leq \sqrt{12d/m} \text{ and } \|C\|_{2,\infty} \leq 2.$$

Next, we consider  $C$  as fixed and analyse the random model for the noise terms  $Z_{\text{pre}}$  and  $Z_{\text{post}}$  (we can treat  $C$  as fixed since the noise is generated independently from  $C$ ). Fixing  $C$ , the rows of  $Z = Z_{\text{pre}}C + Z_{\text{post}}$  are i.i.d. draws from the distribution  $N(0, \sigma_{\text{pre}}^2 C^\top C + \sigma_{\text{post}}^2 \mathbf{I}_m)$ . Then, writing  $\Sigma = \sigma_{\text{pre}}^2 C^\top C + \sigma_{\text{post}}^2 \mathbf{I}_m$ , we have

$$\|Z\| \leq \|Z \cdot \Sigma^{-1/2}\| \cdot \sqrt{\|\Sigma\|} \leq 3\sqrt{n+m} \cdot \sqrt{\|\Sigma\|},$$

with probability at least  $1 - e^{-m}$ , where the last step uses the fact that  $Z \cdot \Sigma^{-1/2}$  is a  $n \times m$  matrix with i.i.d. standard normal entries, and applies Davidson and Szarek [4, Theorem II.13]. Furthermore,

$$\|\Sigma\| \leq \sigma_{\text{pre}}^2 \|C\|^2 + \sigma_{\text{post}}^2 \leq \sigma_{\text{max}}^2 \cdot (12d/m + 1) \leq \left( 4\sigma_{\text{max}} \sqrt{d/m} \right)^2,$$

where the last step follows from Lemma 3. Combining these steps,

$$\|Z\| \leq 12\sigma_{\text{max}} \sqrt{n+m} \cdot \sqrt{d/m}.$$

Next, we need to bound  $\|Z C^\top\|_\infty$ . Note that the entries are distributed as

$$(Z C^\top)_{ij} \sim N(0, \sigma_{\text{pre}}^2 (C C^\top C C^\top)_{jj} + \sigma_{\text{post}}^2 (C C^\top)_{jj}),$$

and this variance term is bounded as

$$\begin{aligned} \sigma_{\text{pre}}^2 (C C^\top C C^\top)_{jj} + \sigma_{\text{post}}^2 (C C^\top)_{jj} &= \sigma_{\text{pre}}^2 \mathbf{e}_j^\top C C^\top C C^\top \mathbf{e}_j + \sigma_{\text{post}}^2 \mathbf{e}_j^\top C C^\top \mathbf{e}_j \\ &\leq \sigma_{\text{max}}^2 (\|C\|^2 + 1) \|C^\top \mathbf{e}_j\|_2^2 \leq \sigma_{\text{max}}^2 \cdot (12d/m + 1) \cdot 2^2 \leq \left( 8\sigma_{\text{max}} \sqrt{d/m} \right)^2, \end{aligned}$$

where the last step follows from Lemma 3. Therefore, using standard tail bounds on the normal distribution, with probability at least  $1 - \frac{2}{nd}$ ,

$$\|Z C^\top\|_\infty = \max_{ij} |(Z C^\top)_{ij}| \leq 8\sigma_{\text{max}} \sqrt{d/m} \cdot 2\sqrt{\log(nd)}.$$

### C.3 Proof of Theorem 3

This result is another immediate consequence of Theorem 1, with  $\tilde{S}_\Omega^*$  in place of  $S^*$  (note that  $\max_i \|(\tilde{S}_\Omega^*)_{i*}\|_0 \leq \max_i \|S_{i*}^*\|_0 \leq s$  by assumption). Since the restricted eigenvalue property and the condition  $\alpha \geq \|L^* C C^\top\|_\infty$  follow from Lemma 1 and Lemma 2 respectively, it is sufficient to check that, with the stated probability, the following statements both hold:

$$\nu \geq 2\|Z\|, \quad \lambda \geq 2\|ZC^\top\|_\infty + 4\alpha, \quad (10)$$

where  $Z = (\tilde{L}_\Omega^* - L^*) \cdot C$  as defined before. Let  $B_{ij} \stackrel{\text{i.i.d.}}{\sim} \text{Bernoulli}(\rho_{ij})$  be an indicator variable for  $(i, j) \in \Omega$ , that is, for whether we observe entry  $(i, j)$ . Then we can write  $\tilde{L}_\Omega^*$  as

$$(\tilde{L}_\Omega^*)_{ij} = \frac{B_{ij}}{\rho_{ij}} \cdot L_{ij}^*$$

for each  $(i, j) \in [n] \times [d]$ , and so  $Z$  can be written as

$$Z = \sum_{ij} \left( \frac{B_{ij}}{\rho_{ij}} - 1 \right) \cdot E_{ij} \quad (11)$$

where  $E_{ij} = L_{ij}^* \cdot \mathbf{e}_i C_{j*}^\top \in \mathbb{R}^{n \times m}$ , and where  $\mathbf{e}_i \in \mathbb{R}^n$  is the  $i$ -th standard basis vector and  $C_{j*} \in \mathbb{R}^m$  is  $j$ -th row of the compression matrix  $C$ . To prove the first inequality in (10), we consider  $C$  as fixed and analyse the random model for  $B_{ij}$ 's. We first have the following bound on the sum of random scalars times fixed matrices:

**Lemma 4** (Adapted from Tropp [8, Theorem 4.1.1]). *Let  $A_1, \dots, A_L \in \mathbb{R}^{d_1 \times d_2}$  be fixed matrices, and let  $B_1, \dots, B_L$  be independent mean-zero random variables, such that for each  $\ell = 1, \dots, L$ ,  $B_\ell$  is  $\sigma^2$ -subgaussian, that is,*

$$\mathbb{E} [e^{tB_\ell}] \leq e^{\sigma^2 t^2 / 2} \text{ for all } t \in \mathbb{R}.$$

Then

$$\mathbb{P} \left\{ \left\| \sum_{\ell=1}^L B_\ell A_\ell \right\| \geq t \right\} \leq (d_1 + d_2) \exp \left\{ - \frac{t^2}{2\sigma^2 \max \left\{ \left\| \sum_{\ell=1}^L A_\ell A_\ell^\top \right\|, \left\| \sum_{\ell=1}^L A_\ell^\top A_\ell \right\| \right\}} \right\}.$$

To apply Lemma 4 to the error term expression  $Z$  in (11), we first show that the random scalar, defined by

$$\tilde{B}_{ij} = \frac{B_{ij}}{\rho_{ij}} - 1,$$

is  $\sigma^2$ -subgaussian with  $\sigma^2 = 2\mu^2$  for all  $(i, j) \in [n] \times [d]$ . To see this, first note that  $\mathbb{E} [\tilde{B}_{ij}] = 0$  and  $|\tilde{B}_{ij}|$  is bounded by  $\mu$  for all  $(i, j) \in [n] \times [d]$ . If  $|t| \geq (2\mu)^{-1}$ , then

$$\mathbb{E} [e^{t\tilde{B}_{ij}}] \leq \mathbb{E} [e^{(2\mu^2 t^2 + \tilde{B}_{ij}^2 / 2\mu^2) / 2}] = e^{\mu^2 t^2} \mathbb{E} [e^{\tilde{B}_{ij}^2 / 4\mu^2}] \leq e^{\mu^2 t^2} e^{1/4} \leq e^{2\mu^2 t^2}$$

where the last inequality holds due to  $|t| \geq (2\mu)^{-1}$ . If  $|t| \leq (2\mu)^{-1}$ , we have  $|t\tilde{B}_{ij}| \leq 1/2$ , and so

$$\mathbb{E} [e^{t\tilde{B}_{ij}}] \leq 1 + t\mathbb{E} [\tilde{B}_{ij}] + t^2 \mathbb{E} [\tilde{B}_{ij}^2] = 1 + t^2 \mathbb{E} [\tilde{B}_{ij}^2] \leq e^{t^2 \mathbb{E} [\tilde{B}_{ij}^2]} \leq e^{\mu^2 t^2}$$

where the first inequality follows from the fact that  $e^x \leq 1 + x + x^2$  for  $|x| \leq 1/2$ . Therefore, we apply Lemma 4 to the error term expression (11) so that, with probability at least  $1 - \frac{1}{nd}$  (with respect to the randomness of the  $B_{ij}$ 's),

$$\|Z\| \leq \sqrt{4\mu^2 \max \left\{ \left\| \sum_{ij} E_{ij} E_{ij}^\top \right\|, \left\| \sum_{ij} E_{ij}^\top E_{ij} \right\| \right\} \log(nd \cdot (n+m))}.$$

Next, we derive the probabilistic bound on  $\max \left\{ \left\| \sum_{ij} E_{ij} E_{ij}^\top \right\|, \left\| \sum_{ij} E_{ij}^\top E_{ij} \right\| \right\}$ . We first state the following bound on  $C$ :

**Lemma 5.** *Under either the Gaussian (3) or orthogonal (4) model for  $C$ , with probability at least  $1 - 2e^{-m}$ ,*

$$\|C\| \leq \sqrt{12d/m} \text{ and } \|C\|_F \leq \sqrt{3d}.$$

Direct calculation shows that

$$\left\| \sum_{ij} E_{ij} E_{ij}^\top \right\| = \max_i \left( \sum_{j=1}^d \|C_{j*}\|_2^2 L_{ij}^{*2} \right) \leq \alpha_0^2 \cdot \|C\|_F^2$$

and

$$\left\| \sum_{ij} E_{ij}^\top E_{ij} \right\| = \left\| \sum_{ij} L_{ij}^{*2} C_{j*} C_{j*}^\top \right\| \leq \alpha_0^2 \cdot n \|C\|^2.$$

Then, applying Lemma 5, with probability at least  $1 - 2e^{-m}$ ,

$$\max \left\{ \left\| \sum_{ij} E_{ij} E_{ij}^\top \right\|, \left\| \sum_{ij} E_{ij}^\top E_{ij} \right\| \right\} \leq \alpha_0^2 \max \{ \|C\|_F^2, n \|C\|^2 \} \leq \alpha_0^2 \cdot 12 \frac{d(n+m)}{m}.$$

In total, we have with probability at least  $1 - \frac{2}{nd}$ ,

$$\|Z\| \leq \mu \alpha_0 \sqrt{48 \frac{d(n+m)}{m} \log(nd(n+m))}.$$

Since  $m \leq d$ , we can write  $\log(nd(n+m)) \leq \log(nd(n+d)) \leq \max\{\log(2n^2d), \log(2nd^2)\} \leq 2 \log(nd)$ , where we assume  $n, d \geq 2$  to avoid triviality. So,

$$\|Z\| \leq 10\mu\alpha_0 \sqrt{\frac{d(n+m)}{m} \log(nd)}. \quad (12)$$

Next, we need to bound on  $\|ZC^\top\|_\infty$ . Note that

$$\|ZC^\top\|_\infty = \|(\tilde{L}_\Omega^* - L^*)CC^\top\|_\infty \leq \|\tilde{L}_\Omega^* - L^*\|_\infty + \|(\tilde{L}_\Omega^* - L^*)(CC^\top - \mathbf{I}_d)\|_\infty.$$

By our assumptions, we can immediately bound  $\|\tilde{L}_\Omega^* - L^*\|_\infty \leq \mu\alpha_0$ . Next consider the term  $\|(\tilde{L}_\Omega^* - L^*)(CC^\top - \mathbf{I}_d)\|_\infty$ . We first consider  $C$  as fixed and analyse the random model for  $B_{ij}$ 's. The  $(i, \ell)$ -th entry of  $(\tilde{L}_\Omega^* - L^*)(CC^\top - \mathbf{I}_d)$  can be written as

$$\left[ (\tilde{L}_\Omega^* - L^*)(CC^\top - \mathbf{I}_d) \right]_{i\ell} = \sum_j \tilde{B}_{ij} \cdot L_{ij}^* (CC^\top - \mathbf{I}_d)_{j\ell},$$

which is mean zero random scalar and bounded above by  $\mu\alpha_0 \|CC^\top - \mathbf{I}_d\|_\infty$ . Therefore, applying Hoeffding's Lemma and union bound, with probability at least  $1 - \frac{1}{nd}$  (with respect to the randomness of the  $B_{ij}$ 's),

$$\|(\tilde{L}_\Omega^* - L^*)(CC^\top - \mathbf{I}_d)\|_\infty \leq \sqrt{2d(\alpha_0 + \alpha_1)^2 \mu^2 \|CC^\top - \mathbf{I}_d\|_\infty^2 \log(2n^2d^2)}. \quad (13)$$

For the bound on  $\|CC^\top - \mathbf{I}_d\|_\infty$ , we have the following result:

**Lemma 6.** *Under either the Gaussian (3) or orthogonal (4) model for  $C$ , with probability at least  $1 - \frac{4}{nd}$ ,*

$$\|CC^\top - \mathbf{I}_d\|_\infty \leq \sqrt{\frac{24 \log(nd)}{m}}.$$

Combining (13) with Lemma 6, we have with probability at least  $1 - \frac{5}{nd}$ ,

$$\|ZC^\top\|_\infty \leq 7\mu\alpha_0 \sqrt{\frac{d \log(nd) \log(2n^2d^2)}{m}} \leq 12\mu\alpha_0 \sqrt{\frac{d \log^2(nd)}{m}}.$$

#### C.4 Proof of Proposition 1

In order to apply Theorem 1, it is sufficient to check the conditions

$$\alpha \geq \|L^* C C^\top\|_\infty = \|L^* X^\top X\|_\infty, \nu \geq 2\|Z\| = 2\|W^\top\|, \lambda \geq 2\|Z C^\top\|_\infty + 4\alpha = 2\|W^\top X\|_\infty + 4\alpha.$$

The lower bound on  $\alpha$  is true by definition. For the lower bound on  $\nu$ , the following result from Davidson and Szarek [4, Theorem II.13]: if entries of  $W \in \mathbb{R}^{m \times n}$  are generated as i.i.d.  $N(0, \sigma^2)$ , then with probability at least  $1 - e^{-m}$ ,

$$\|W\| \leq 3\sigma\sqrt{n+m}.$$

Finally, we bound  $\|W^\top X\|_\infty$ . The entries of  $W^\top X$  are distributed as

$$(W^\top X)_{ij} \sim N(0, \sigma^2 \|X_{*j}\|_2^2) = N(0, \sigma^2),$$

where the last step holds since the columns of  $X$  are normalized. Therefore, using the standard tail bounds on the normal distribution, with probability at least  $1 - \frac{2}{nd}$ ,

$$\|W^\top X\|_\infty = \max_{ij} |(W^\top X)_{ij}| \leq 2\sigma\sqrt{\log(nd)}.$$

### D Proofs of lemmas

#### D.1 Concentration lemma

We first state a concentration result under the Gaussian model (3) or the orthogonal model (4):

**Lemma 7.** *Under either the Gaussian model (3) or the orthogonal model (4), for any fixed vector  $w \in \mathbb{R}^d$  and any  $\epsilon > 0$ ,*

$$\mathbb{P} \left\{ \frac{\|C^\top w\|_2^2}{\|w\|_2^2} - 1 > \epsilon \right\} \leq \exp \left\{ -\frac{m}{8} \cdot \min\{\epsilon, \epsilon^2\} \right\}, \mathbb{P} \left\{ \frac{\|C^\top w\|_2^2}{\|w\|_2^2} - 1 < -\epsilon \right\} \leq \exp \left\{ -\frac{m}{4} \epsilon^2 \right\}. \quad (14)$$

*Proof.* Under the Gaussian model,

$$m \cdot \frac{\|C^\top w\|_2^2}{\|w\|_2^2} \sim \chi_m^2$$

and therefore, by the  $\chi^2$  tail bounds of Laurent and Massart [6, Lemma 1], for any  $t > 0$ ,

$$\mathbb{P} \left\{ m \cdot \frac{\|C^\top w\|_2^2}{\|w\|_2^2} > m + 2\sqrt{mt} + 2t \right\} \leq e^{-t} \text{ and } \mathbb{P} \left\{ m \cdot \frac{\|C^\top w\|_2^2}{\|w\|_2^2} < m - 2\sqrt{mt} \right\} \leq e^{-t}.$$

Setting  $t = \frac{m}{8} \cdot \min\{\epsilon, \epsilon^2\}$ , we obtain the desired result (14). Next, turning to the orthogonal model,

we have  $G = \sqrt{\frac{d}{m}} \cdot U$  where  $U \in \mathbb{R}^{d \times m}$  is an orthonormal matrix chosen uniformly at random.

Let  $v \in \mathbb{R}^d$  be a random unit vector. Then  $\|U^\top w\|_2^2$  is equal in distribution to  $v_1^2 + \dots + v_m^2$ . In this setting, Dubhashi and Panconesi [5, Lemma 2.4] states that, for any  $0 < \beta_0 < 1$ ,

$$\mathbb{P} \left\{ v_1^2 + \dots + v_m^2 < \beta_0 \frac{m}{d} \right\} \leq \exp \left\{ \frac{m}{2} (1 - \beta_0 + \log(\beta_0)) \right\}$$

and for any  $\beta_1 > 1$ ,

$$\mathbb{P} \left\{ v_1^2 + \dots + v_m^2 > \beta_1 \frac{m}{d} \right\} \leq \exp \left\{ \frac{m}{2} (1 - \beta_1 + \log(\beta_1)) \right\}.$$

Next, set  $\beta_1 = 1 + \epsilon$ . Then, since for all  $x > 0$  we have  $\log(1 + x) \leq x - \frac{\min\{x, x^2\}}{4}$ , then

$$1 - \beta_1 + \log(\beta_1) \leq 1 - (1 + \epsilon) + \epsilon - \frac{\min\{\epsilon, \epsilon^2\}}{4} = -\frac{\min\{\epsilon, \epsilon^2\}}{4}.$$

Therefore,

$$\mathbb{P} \left\{ \frac{\|C^\top w\|_2^2}{\|w\|_2^2} > 1 + \epsilon \right\} \leq \exp \left\{ -\frac{m}{8} \cdot \min\{\epsilon, \epsilon^2\} \right\}.$$



Next we want to bound the probability of the event  $\frac{\|C^\top w\|_2^2}{\|w\|_2^2} < 1 - \epsilon$ . If  $\epsilon \geq 1$  then trivially this cannot occur. If instead  $\epsilon < 1$ , then we set  $\beta_0 = 1 - \epsilon$ . Since  $\log(1 - x) \leq -x - \frac{x^2}{2}$  for all  $0 < x < 1$ , we have

$$1 - \beta_0 + \log(\beta_0) = 1 - (1 - \epsilon) - \epsilon - \frac{\epsilon^2}{2} = -\frac{\epsilon^2}{2},$$

and so

$$\mathbb{P} \left\{ \frac{\|C^\top w\|_2^2}{\|w\|_2^2} < 1 - \epsilon \right\} \leq \exp \left\{ -\frac{m}{4} \cdot \epsilon^2 \right\}.$$

This is sufficient to prove the desired bound.  $\square$

## D.2 Proof of Lemma 2 (elementwise bounds)

Set  $\epsilon = \sqrt{\frac{16 \log(nd)}{m}}$  and note that  $\epsilon \leq 1$  by assumption. For each  $i \in [n]$ , define the unit vector  $v_i = \frac{L_{i*}^*}{\|L_{i*}^*\|_2}$  (treated as a column vector). Now fix any  $i \in [n]$  and any  $j \in [d]$ . Then

$$(L^* C C^\top)_{ij} = \|L_{i*}^*\|_2 \cdot v_i^\top C C^\top \mathbf{e}_j = \|L_{i*}^*\|_2 \cdot \frac{1}{4} (\|C^\top(v_i + \mathbf{e}_j)\|_2^2 - \|C^\top(v_i - \mathbf{e}_j)\|_2^2).$$

By Lemma 7, with probability at least  $1 - 4e^{-m\epsilon^2/8}$ ,

$$\left| \frac{\|C^\top(v_i + \mathbf{e}_j)\|_2^2}{\|v_i + \mathbf{e}_j\|_2^2} - 1 \right| \leq \epsilon \quad \text{and} \quad \left| \frac{\|C^\top(v_i - \mathbf{e}_j)\|_2^2}{\|v_i - \mathbf{e}_j\|_2^2} - 1 \right| \leq \epsilon.$$

If these bounds hold, then

$$\begin{aligned} (L^* C C^\top)_{ij} &= \|L_{i*}^*\|_2 \cdot \frac{1}{4} (\|C^\top(v_i + \mathbf{e}_j)\|_2^2 - \|C^\top(v_i - \mathbf{e}_j)\|_2^2) \\ &\leq \|L_{i*}^*\|_2 \cdot \frac{1}{4} ((1 + \epsilon) \cdot \|v_i + \mathbf{e}_j\|_2^2 - (1 - \epsilon) \cdot \|v_i - \mathbf{e}_j\|_2^2) \\ &= \|L_{i*}^*\|_2 \cdot \frac{1}{4} ((\|v_i + \mathbf{e}_j\|_2^2 - \|v_i - \mathbf{e}_j\|_2^2) + \epsilon (\|v_i + \mathbf{e}_j\|_2^2 + \|v_i - \mathbf{e}_j\|_2^2)) \\ &= \|L_{i*}^*\|_2 \cdot \frac{1}{4} (4\langle v_i, \mathbf{e}_j \rangle + \epsilon (2\|v_i\|_2^2 + 2\|\mathbf{e}_j\|_2^2)) \\ &= \|L_{i*}^*\|_2 \cdot (\langle v_i, \mathbf{e}_j \rangle + \epsilon) \quad \text{since } \|v_i\|_2 = \|\mathbf{e}_j\|_2 = 1 \\ &= \langle L_{i*}^*, \mathbf{e}_j \rangle + \epsilon \|L_{i*}^*\|_2 \quad \text{by definition of } v_i \\ &= L_{ij}^* + \epsilon \|L_{i*}^*\|_2 \\ &\leq \|L^*\|_\infty (1 + \epsilon\sqrt{d}). \end{aligned}$$

Using the same arguments, the same bound holds for  $-(L^* C C^\top)_{ij}$ , and therefore,

$$|(L^* C C^\top)_{ij}| \leq \|L^*\|_\infty (1 + \epsilon\sqrt{d}).$$

Applying the union bound over each  $i \in [n]$  and each  $j \in [d]$ , we see that

$$\|L^* C C^\top\|_\infty \leq \|L^*\|_\infty (1 + \epsilon\sqrt{d})$$

with probability at least

$$1 - nd \cdot 4e^{-m\epsilon^2/8} = 1 - 4nd \exp \left\{ \frac{m}{8} \left( \sqrt{\frac{16 \log(nd)}{m}} \right)^2 \right\} = 1 - \frac{4}{nd}.$$

## D.3 Proof of Lemma 3 (bounds on random compression matrix)

First we treat  $\|C\|$ . Under the orthogonal model,  $\|C\| \leq \sqrt{d/m}$  trivially, while under the Gaussian model for  $C$  (3),  $\|C\| \leq \sqrt{d/m}(2 + \sqrt{2})$  with probability at least  $1 - e^{-m}$  by again applying [4, Theorem II.13]. Next consider  $\|C\|_{2,\infty} = \max_{i=1,\dots,d} \|C^\top \mathbf{e}_i\|_2$ . For each  $i$ , by Lemma 7,

$$\mathbb{P} \{ \|C^\top \mathbf{e}_j\|_2 > 2 \} \leq e^{-m/8}.$$

Therefore,

$$\mathbb{P} \{ \|C\|_{2,\infty} > 2 \} \leq d \cdot e^{-m/8}.$$

#### D.4 Proof of Lemma 4 (bounds on matrix subgaussian series)

Tropp [8, Theorem 4.1.1] proves this exact statement for the special case that either  $B_\ell \stackrel{\text{iid}}{\sim} N(0, 1)$  (Gaussian variables) or  $B_\ell \stackrel{\text{iid}}{\sim} \{\pm 1\}$  (Rademacher variables). To see why the statement holds in this more general case, we observe that for Corollary 4.2 in Tropp, the distribution of the  $B_\ell$ 's is used only once: to prove the bound

$$\mathbb{E} [e^{tB_\ell A}] \preceq e^{t^2 A^2 / 2}$$

for each  $\ell$  and for any fixed Hermitian matrix  $A$ . For the general case, take a fixed Hermitian matrix  $A$ , with  $A = Q\Lambda Q^\top$  its eigendecomposition. We have

$$\begin{aligned} \mathbb{E} [e^{tB_\ell A}] &= \mathbb{E} [e^{Q \cdot (tB_\ell \Lambda) \cdot Q^\top}] \\ &= Q \cdot \text{diag}\{\mathbb{E} [e^{tB_\ell \lambda_i}]\} \cdot Q^\top \\ &\preceq Q \cdot \text{diag}\{e^{\sigma^2 t^2 \lambda_i^2 / 2}\} \cdot Q^\top \\ &= e^{Q \cdot (\sigma^2 t^2 \Lambda^2 / 2) \cdot Q^\top} \\ &= e^{\sigma^2 t^2 A^2 / 2}. \end{aligned}$$

Therefore, this is sufficient to see that Corollary 4.2 of Tropp holds in this case also.

#### D.5 Proof of Lemma 5 (bounds on random compression matrix)

The result for  $\|C\|$  follows from Lemma 3. Next consider  $\|C\|_F^2$ . Under the orthogonal model,  $\|C\|_F^2 = \text{tr}(C^\top C) = d$  holds. Under the Gaussian model for  $C$ , we note that  $\|C\|_F^2 \sim \chi_{md}^2/m$ . By the  $\chi^2$  tail bounds of Laurent and Massart [6, Lemma 1], we have

$$\mathbb{P} \left\{ \|C\|_F^2 \geq d + 2\sqrt{d} + 2 \right\} \leq e^{-m}.$$

Since  $3d \geq d + 2\sqrt{d} + 2$  for  $d \geq 1$ , with probability at least  $1 - e^{-m}$ , we have  $\|C\|_F^2 \leq 3d$ .

#### D.6 Proof of Lemma 6 (bounds on random compression matrix)

This result is the consequence of Lemma 7 and union bound. Set  $\epsilon = \sqrt{\frac{24 \log(nd)}{m}}$  and  $\epsilon \leq 1$ . By Lemma 7, with probability at least  $1 - 2e^{-m\epsilon^2/8}$ , for  $i \neq j$ ,

$$\begin{aligned} (CC^\top - \mathbf{I}_d)_{ij} &= \mathbf{e}_i^\top (CC^\top - \mathbf{I}_d) \mathbf{e}_j = \frac{1}{4} (\|C^\top(\mathbf{e}_i + \mathbf{e}_j)\|^2 - \|C^\top(\mathbf{e}_i - \mathbf{e}_j)\|^2) \\ &\leq \frac{1}{4} ((1 + \epsilon)\|\mathbf{e}_i + \mathbf{e}_j\|^2 - (1 - \epsilon)\|\mathbf{e}_i - \mathbf{e}_j\|^2) \leq \epsilon. \end{aligned}$$

The same bound holds for  $-(CC^\top - \mathbf{I}_d)_{ij}$  if we use the same arguments, and so with probability at least  $1 - 4e^{-m\epsilon^2/8}$ ,

$$|(CC^\top - \mathbf{I}_d)_{ij}| \leq \epsilon.$$

For  $i = j$ , applying Lemma 7 again, with probability at least  $1 - 2e^{-m\epsilon^2/8}$ ,

$$|(CC^\top - \mathbf{I}_d)_{ii}| = |\mathbf{e}_i^\top (CC^\top - \mathbf{I}_d) \mathbf{e}_i| = \left| \|C^\top \mathbf{e}_i\|_2^2 - 1 \right| \leq \epsilon.$$

Applying the union bound over each  $(i, j) \in [d] \times [d]$ , we have that

$$\|CC^\top - \mathbf{I}_d\|_\infty \leq \sqrt{\frac{24 \log(nd)}{m}}$$

with probability at least  $1 - 4d^2 e^{-m\epsilon^2/8} \geq 1 - \frac{4}{nd}$ .

## D.7 Proof of Lemma 1 (restricted strong convexity)

First, for the Gaussian model (3), by Raskutti et al. [7, Theorem 1], for universal constants  $c, c' > 0$ ,

$$\mathbb{P} \left\{ \|C^\top x\|_2 \geq \frac{1}{4} \|x\|_2 - 9 \sqrt{\frac{\log(d)}{m}} \|x\|_1 \text{ for all } x \in \mathbb{R} \right\} \geq 1 - c' e^{-cm}.$$

Next, we turn to the orthogonal model (4). Let  $H \in \mathbb{R}^{d \times m}$  be a matrix with  $H_{ij} \stackrel{\text{iid}}{\sim} N(0, 1/m)$ , let  $H = UDV^\top$  be its singular value decomposition, and without loss of generality take  $C = \sqrt{\frac{d}{m}} \cdot U$  (since  $H$  is rotation invariant and so  $U$  is uniformly distributed over the space of uniform matrices, this satisfies the orthogonal model (4)). Then for any  $x \in \mathbb{R}^d$ ,

$$\|H^\top x\|_2^2 = \|VDU^\top x\|_2^2 \leq \|VD\|^2 \|U^\top x\|_2^2 = \|H\|^2 \cdot \frac{m}{d} \cdot \|C^\top x\|_2^2.$$

By the work above for the Gaussian model, with probability at least  $1 - c' e^{-cm}$ ,

$$\|H^\top x\|_2 \geq \frac{1}{4} \|x\|_2 - 9 \sqrt{\frac{\log(d)}{m}} \|x\|_1 \text{ for all } x \in \mathbb{R}^d,$$

and by Davidson and Szarek [4, Theorem II.13], with probability at least  $1 - e^{-m}$ ,

$$\|H\| \leq \sqrt{\frac{d}{m}} + 1 + \sqrt{\frac{2m}{d}} \leq \sqrt{\frac{d}{m}} (2 + \sqrt{2}).$$

Combining all these bounds, with probability at least  $1 - c' e^{-cm} - e^{-m} \geq 1 - (c' + 1)e^{-\min\{c, 1\} \cdot m}$ , for all  $x \in \mathbb{R}^d$ ,

$$\|C^\top x\|_2 \geq \frac{1}{4(2 + \sqrt{2})} \|x\|_2 - \frac{9}{2 + \sqrt{2}} \sqrt{\frac{\log(d)}{m}} \|x\|_1.$$

Clearly, this statement holds also for the Gaussian model as well (since this is a strictly weaker result than the one stated above.)

## References

- [1] Alekh Agarwal, Sahand Negahban, Martin J Wainwright, et al. Noisy matrix decomposition via convex relaxation: Optimal rates in high dimensions. *The Annals of Statistics*, 40(2):1171–1197, 2012.
- [2] Peter J Bickel, Ya'acov Ritov, and Alexandre B Tsybakov. Simultaneous analysis of lasso and dantzig selector. *The Annals of Statistics*, pages 1705–1732, 2009.
- [3] Emmanuel J Candès, Xiaodong Li, Yi Ma, and John Wright. Robust principal component analysis? *Journal of the ACM (JACM)*, 58(3):11, 2011.
- [4] Kenneth R Davidson and Stanislaw J Szarek. Local operator theory, random matrices and banach spaces. *Handbook of the geometry of Banach spaces*, 1:317–366, 2001.
- [5] Devdatt P Dubhashi and Alessandro Panconesi. *Concentration of measure for the analysis of randomized algorithms*. Cambridge University Press, 2009.
- [6] Beatrice Laurent and Pascal Massart. Adaptive estimation of a quadratic functional by model selection. *Annals of Statistics*, pages 1302–1338, 2000.
- [7] Garvesh Raskutti, Martin J Wainwright, and Bin Yu. Restricted eigenvalue properties for correlated gaussian designs. *The Journal of Machine Learning Research*, 11:2241–2259, 2010.
- [8] Joel A Tropp. An introduction to matrix concentration inequalities. *To appear in Foundations and Trends in Machine Learning*, 2015.
